# Supplementary material for: The Role of Heat Shock Protein 70 in the Protective Effect of YC-1 on β-Amyloid-Induced Toxicity in Differentiated PC12 Cells
Source: PubMed Central journal article supplement (PMC3724837; doi:10.1371/journal.pone.0069320), 2013-07-26

2/6

$\beta$ -actin

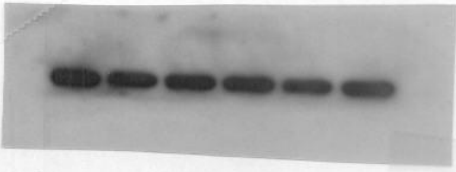

Calpain 1<sup>o</sup> 1:500 2<sup>o</sup> 1:5000

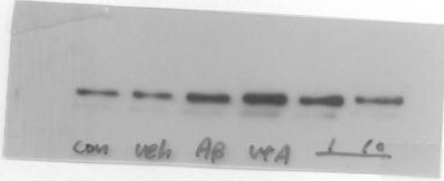

PHF-tau 1<sup>o</sup> 1:500 2<sup>o</sup> 1:1000

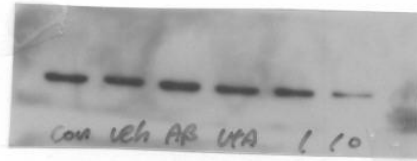

p25

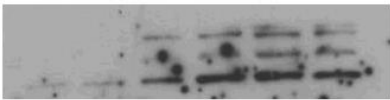

total-tau 1<sup>o</sup> 1:1000 2<sup>o</sup> 1:5000

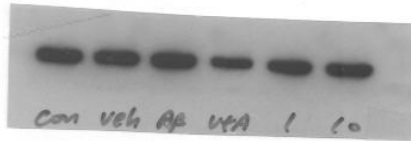

CDK5 1<sup>o</sup> 1:1000 2<sup>o</sup> 1:5000

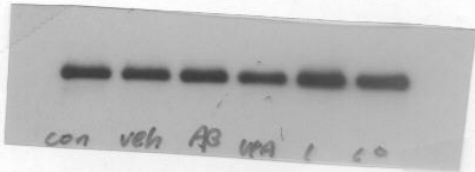

$\chi^2_{total}$

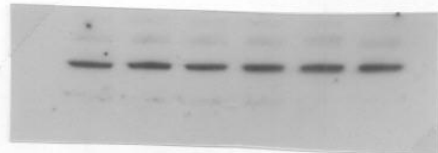

3/1

$\beta$ -actin

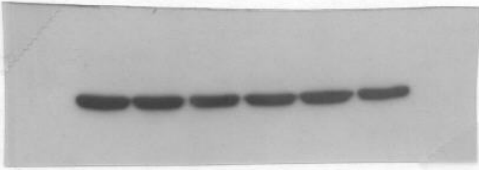

calpain

p35

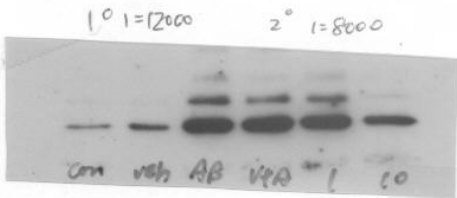

CDK5 1° 1=1000      2° 1=5000

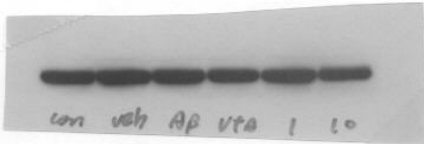

HSP70 1° 1=1000      2° 1=3000

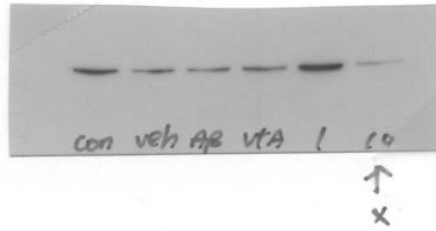

PHF-tau 1° 1=1000      2° 1=5000

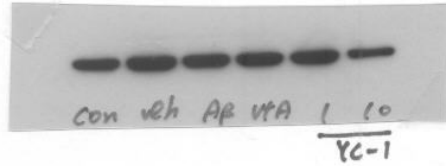

total-tau 1° 1=1000      2° 1=5000

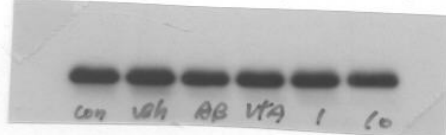

3/2-1

$\beta$ -actin

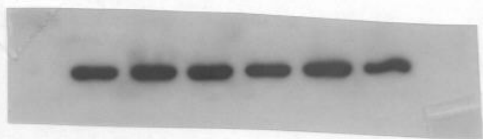

calpain

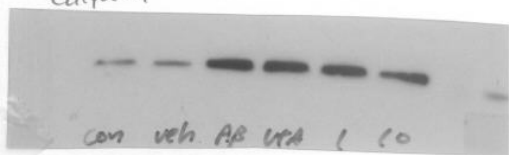

PHF

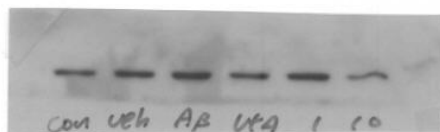

P25

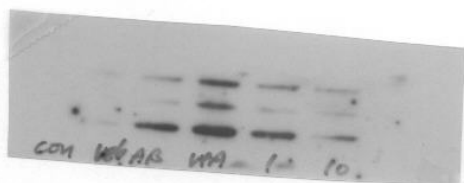

total-tau

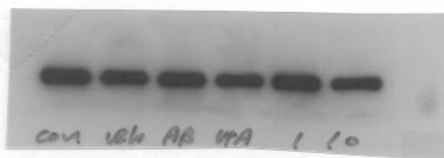

CDK5

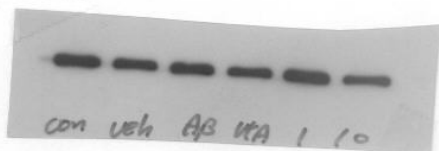

3/2 ~

$\beta$ -actin

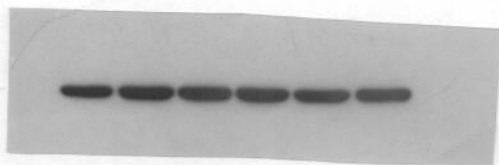

calpain

HSP70 1° 1=1000 2° 1=5000

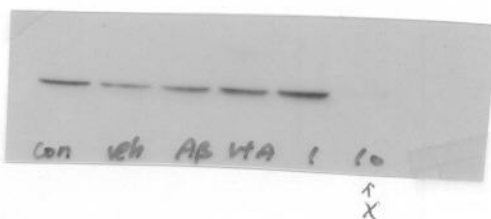

P25/35

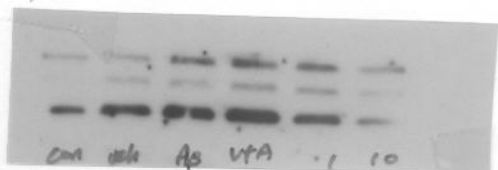

PHF-tau 1° 1=1000 2° 1=5000

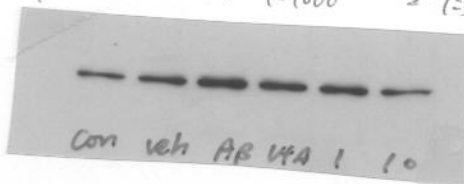

CDK5

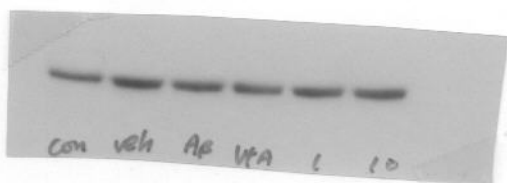

total-tau 1° 1=1000 2° 1=5000

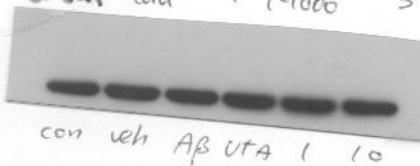

7/3

β-actin

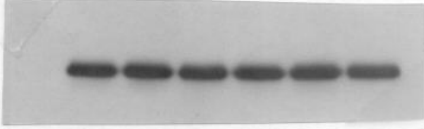

HSP 70 1° (=1000) 2° (=5000)

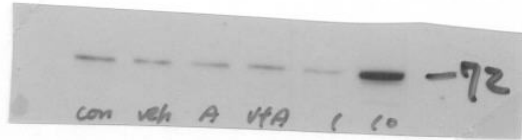

P35 1° (=2000) 2° (=8000)

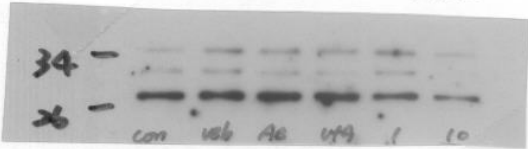

PHF 1° (=1000) 2° (=5000)

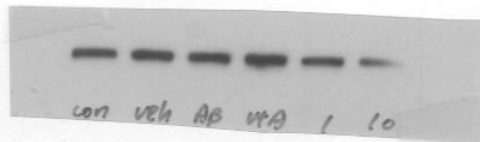

CDK5 1° (=1000) 2° (=5000)

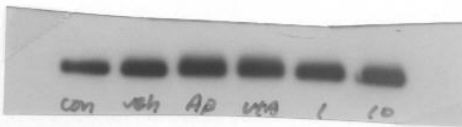

total-tau 1° (=1000) 2° (=5000)

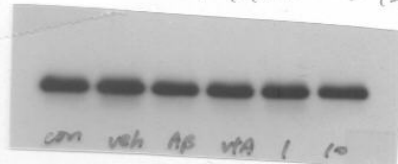

9/24

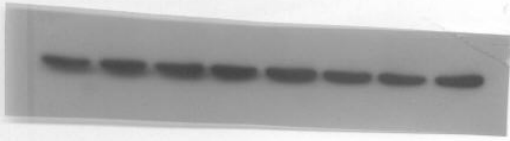

$\beta$ -actin

1° 1:5000

2° 1:20000

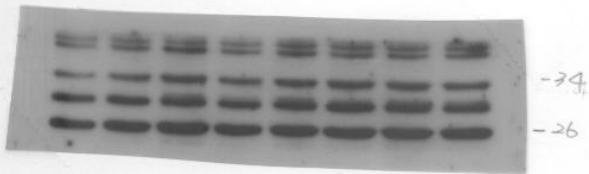

P35 - P35

1° 1:1000

2° 1:5000

con veh A $\beta$  V+A 01 1 5 10  
Y C 1

雜 band 很明顯

3/9

ODQ

$\beta$ -actin

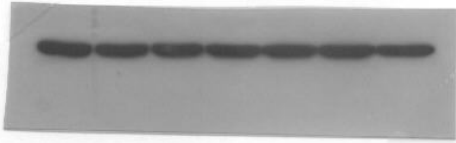

Calpain

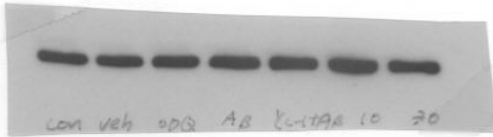

PHF-tau

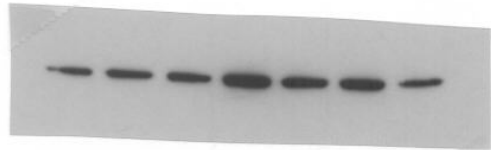

p35

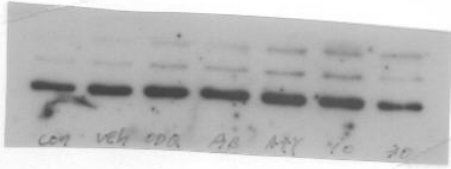

tau

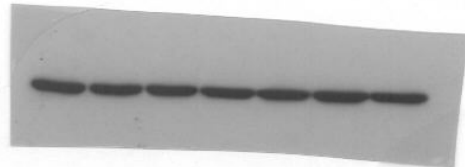

CDK5

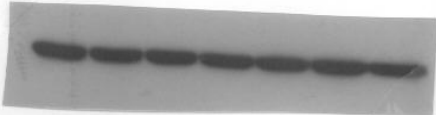

8/15

ODG

f-tau

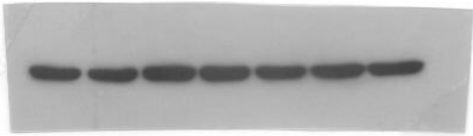

calpain

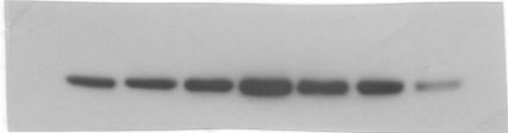

|     |     |             |         |                 |                      |                                     |                                     |
|-----|-----|-------------|---------|-----------------|----------------------|-------------------------------------|-------------------------------------|
| con | veh | ODG<br>30μM | Aβ<br>+ | Aβ<br>+<br>YC-1 | Aβ<br>+<br>YC-1<br>+ | Aβ<br>+<br>YC-1<br>+<br>ODG<br>10μM | Aβ<br>+<br>YC-1<br>+<br>ODG<br>30μM |
|-----|-----|-------------|---------|-----------------|----------------------|-------------------------------------|-------------------------------------|

PHF-tau

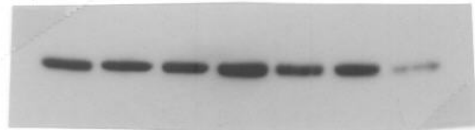

p35

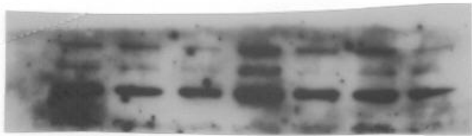

|     |     |     |    |         |             |             |
|-----|-----|-----|----|---------|-------------|-------------|
| con | veh | ODG | Aβ | Aβ<br>+ | ODG<br>10μM | 30μM<br>ODG |
|     |     |     |    | YC-1    |             |             |

tau

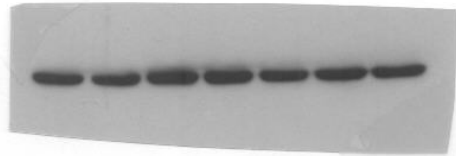

CDK5

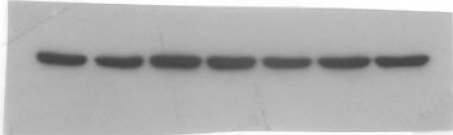



ODG 10  $\mu$ M, 30  $\mu$ M

$\beta$ -actin 1 $^{\circ}$  1=500 2 $^{\circ}$  1=20000

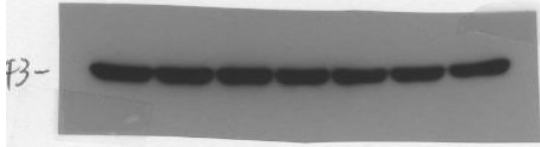

calpain 1 $^{\circ}$  1=500 2 $^{\circ}$  1=5000

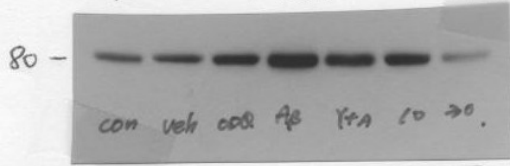

ODG  
+  
A $\beta$   
+  
YC-1

p75 1 $^{\circ}$  1=2000 2 $^{\circ}$  1=8000

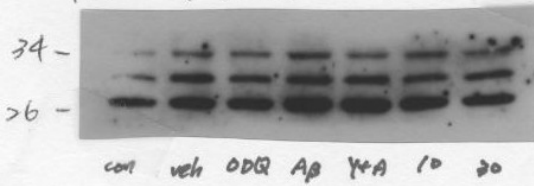

CDK5 1 $^{\circ}$  1=1000 2 $^{\circ}$  1=5000

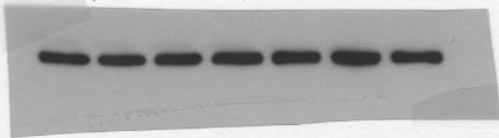

4/5

ODQ - tau

actin 1° (=5000) 2° (=5000)

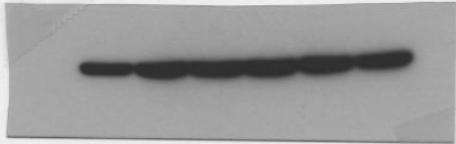

P-tau 1° (=1000) 2° (=5000)

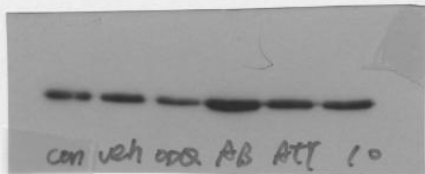

con veh ODQ AB ATY 1°

(ATY+ODQ)

total-tau

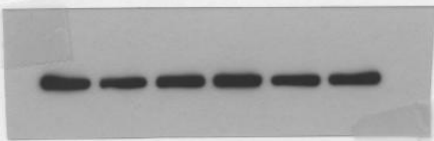

4/9

ODQ 10 μM

β-actin

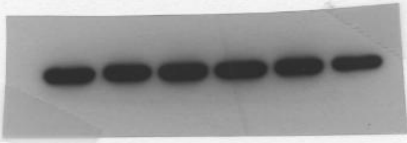

calpain

1° 1:500 2° 1:5000

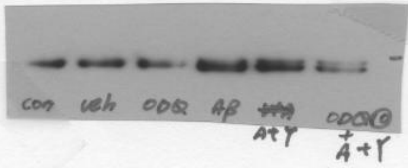

P-tau 1° 1:1000 2° 1:5000

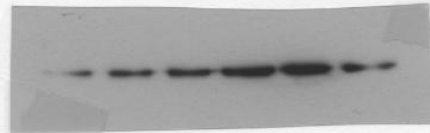

p35/s5

1° 1:1000 2° 1:10000

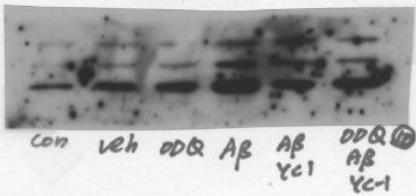

total-tau 1° 1:1000 2° 1:5000

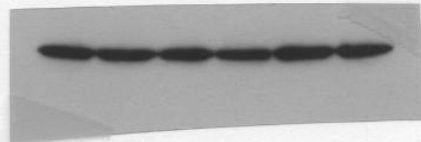

CDK5

1° 1:1000 2° 1:5000

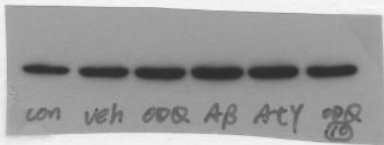

4/8

ODQ 10  $\mu$ M

$\beta$ -actin

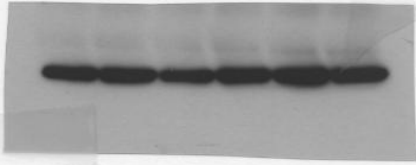

Calpain 1 $^{\circ}$  = 500 2 $^{\circ}$  = 5000

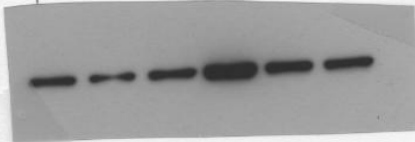

P-tau

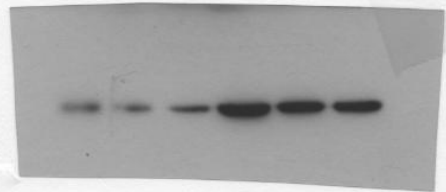

Q

P35/35 1 $^{\circ}$  = 2000 2 $^{\circ}$  = 8000

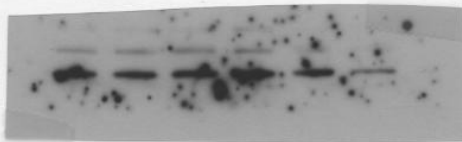

total - tau

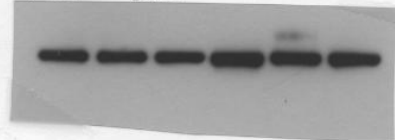

Supplement: pone.0069320.s001.pdf [file pone.0069320.s001.pdf]
